# Supplementary material
Source: publisher site journal article supplement (https://www.dovepress.com/article/385186)
Supplement: Supplementary file 1 [file get_supplementary_file.php]

## Supplementary materials

**Table S1** Characteristics at Registration of Patients Included in the 2-year Analysis<sup>a</sup>.

|                                                                                     |         | Full analysis set |
|-------------------------------------------------------------------------------------|---------|-------------------|
|                                                                                     |         | N = 708           |
| Sex, male, n (%)                                                                    |         | 638 (90.1)        |
| Age, years, mean (SD)                                                               |         | 73.5 (7.7)        |
| BMI, kg/m <sup>2</sup> , mean (SD)                                                  | n = 707 | 22.9 (3.5)        |
| Smoking status, n (%)                                                               |         |                   |
| Current smoker                                                                      |         | 81 (11.4)         |
| Never smoker                                                                        |         | 12 (1.7)          |
| Ex-smoker                                                                           |         | 615 (86.9)        |
| Smoking history, pack-years, mean (SD)                                              | n = 691 | 56.2 (34.3)       |
| Duration of COPD, years, mean (SD)                                                  | n = 692 | 5.7 (5.2)         |
| GOLD stage, n (%)                                                                   | n = 703 |                   |
| I                                                                                   |         | 199 (28.3)        |
| II                                                                                  |         | 326 (46.4)        |
| III                                                                                 |         | 135 (19.2)        |
| IV                                                                                  |         | 43 (6.1)          |
| Post-bronchodilator FEV <sub>1</sub> /FVC%, mean (SD)                               | n = 704 | 52.0 (12.7)       |
| Post-bronchodilator FEV <sub>1</sub> % predicted, mean (SD)                         | n = 703 | 65.1 (22.2)       |
| FEV <sub>1</sub> reversibility (change in FEV <sub>1</sub> >12% and >200 mL), n (%) | n = 331 | 20 (6.0)          |
| Complication/comorbidity, n (%)                                                     |         |                   |
| Asthma (based on physician's diagnosis)                                             |         | 256 (36.2)        |
| Age at onset <40 years                                                              |         | 24/241 (10.0)     |
| Age at onset ≥40 years                                                              |         | 217/241 (90.0)    |

|                                               |            |
|-----------------------------------------------|------------|
| Allergic rhinitis                             | 74 (10.5)  |
| Heart failure                                 | 61 (8.6)   |
| Diabetes                                      | 90 (12.7)  |
| Respiratory medication at registration, n (%) |            |
| ICS (as monotherapy or any combinations)      | 302 (42.7) |
| ICS monotherapy                               | 12 (1.7)   |
| LAMA monotherapy                              | 77 (10.9)  |
| LABA monotherapy                              | 40 (5.6)   |
| LAMA and LABA <sup>b</sup>                    | 272 (38.4) |
| ICS and LABA <sup>b</sup>                     | 99 (14.0)  |
| ICS and LAMA                                  | 7 (1.0)    |
| ICS, LAMA, and LABA <sup>b</sup>              | 184 (26.0) |

---

<sup>a</sup> The date of database lock for the analysis was 1 September 2021. <sup>b</sup> Including any combinations of separate and combined inhalers.

**Abbreviations:** BMI, body mass index; COPD, chronic obstructive pulmonary disease; FEV<sub>1</sub>, forced expiratory volume in one second; FVC, forced vital capacity; GOLD, Global Initiative for Chronic Obstructive Lung Disease; ICS, inhaled corticosteroids; LABA, long-acting  $\beta$ 2-agonist; LAMA, long-acting muscarinic antagonist; SD, standard deviation

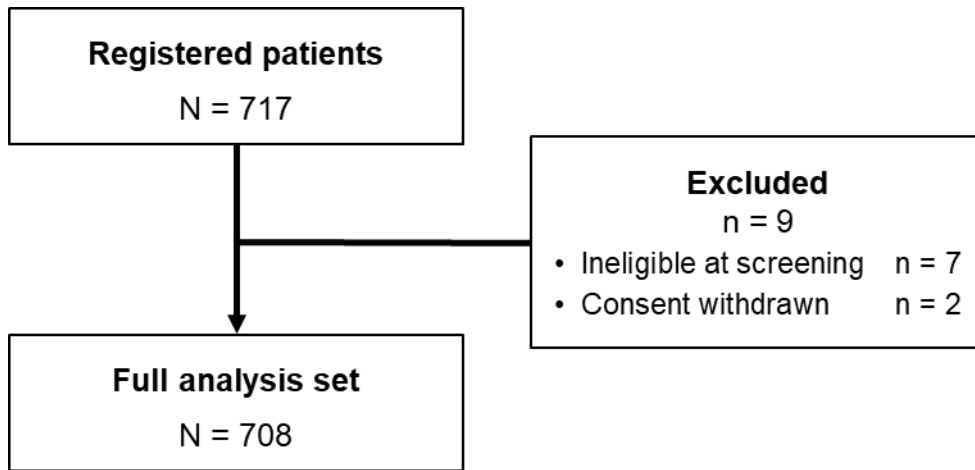

**Figure S1** Flow diagram of patient disposition.<sup>12</sup>

Reprinted with modification from Hashimoto et al. *Adv Ther* 2021;38:1168–1184, under CC BY-NC license.
